# Supplementary material for: Are Long-Range Structural Correlations Behind the Aggregration Phenomena of Polyglutamine Diseases?
Source: PubMed Central journal article supplement (PMC3343152; doi:10.1371/journal.pcbi.1002501), 2012-04-26
Supplement: pcbi.1002501.s004.pdf [file pcbi.1002501.s004.pdf]

**Table Table S1. Radius of gyration and cis-trans isomerization.**

| $n$ | $R_g(Q_n)$ |         | $R_g(Q_nP_6)$ |         | trans content  |                |                |                |                |                |                | all-trans population |
|-----|------------|---------|---------------|---------|----------------|----------------|----------------|----------------|----------------|----------------|----------------|----------------------|
|     | mean       | st.dev. | mean          | st.dev. | P <sup>1</sup> | P <sup>2</sup> | P <sup>3</sup> | P <sup>4</sup> | P <sup>5</sup> | P <sup>6</sup> | <b>average</b> |                      |
| 40  | 14.06      | 1.80    | 14.45         | 2.41    | 85             | 88             | 98             | 92             | 93             | 96             | <b>92</b>      | 60                   |
| 30  | 12.96      | 1.71    | -             | -       | -              | -              | -              | -              | -              | -              | -              | -                    |
| 18  | 8.20       | 0.96    | 8.01          | 0.95    | 68             | 67             | 69             | 80             | 87             | 91             | <b>77</b>      | 23                   |
| 12  | 5.83       | 0.65    | 5.81          | 0.67    | 69             | 68             | 68             | 78             | 87             | 94             | <b>77</b>      | 22                   |
| 9   | 4.69       | 0.57    | 4.47          | 0.53    | 71             | 64             | 63             | 82             | 89             | 93             | <b>77</b>      | 18                   |
| 6   | 3.62       | 0.57    | 3.73          | 0.67    | 73             | 73             | 52             | 64             | 84             | 91             | <b>73</b>      | 12                   |

The mean radius of gyration and its standard deviation (in Å) for  $Q_n$  and  $Q_nP_6$  peptides, along with the trans content (as a percentage) of all prolyl bonds of  $Q_nP_6$  peptides along with their averages are given. The population of all-trans structures for each  $Q_nP_6$  peptide is given as well.
